# Supplementary material
Source: PubMed Central journal article supplement (PMC7754205)

Figure 1A

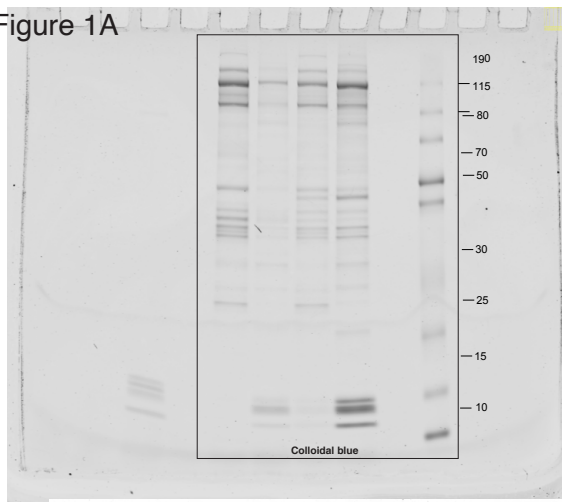

Figure 1C

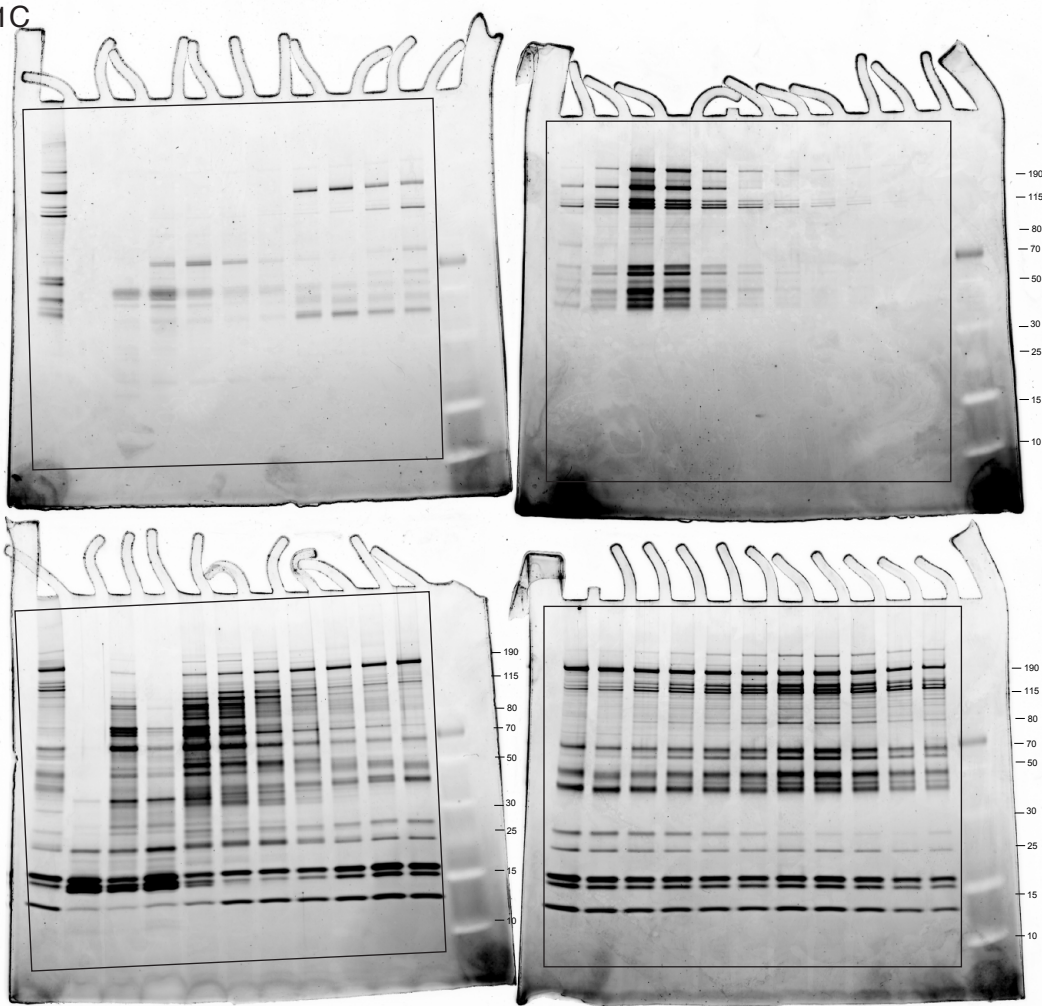

Figure 1D

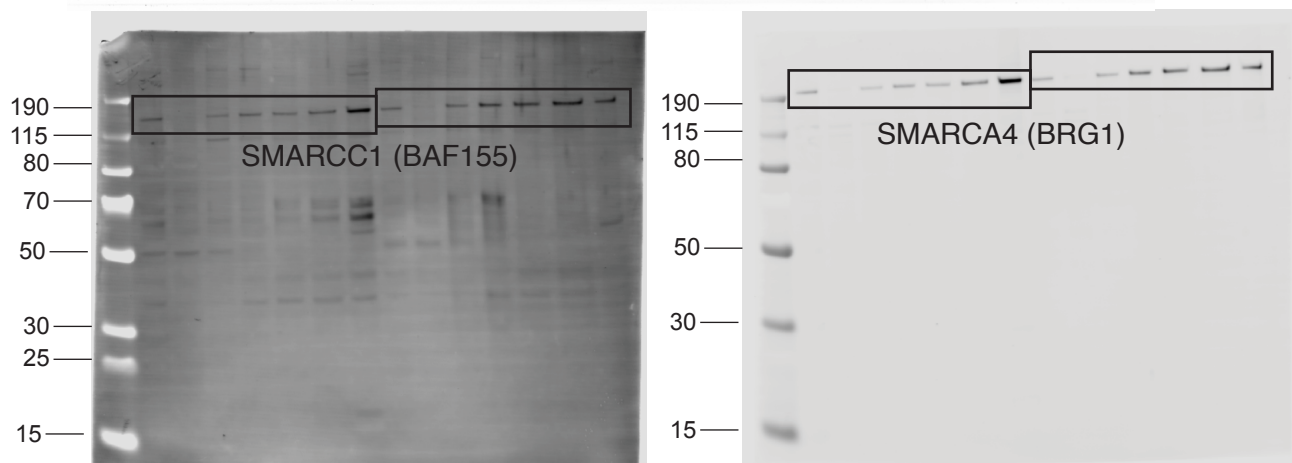

Extended Data Figure 1E

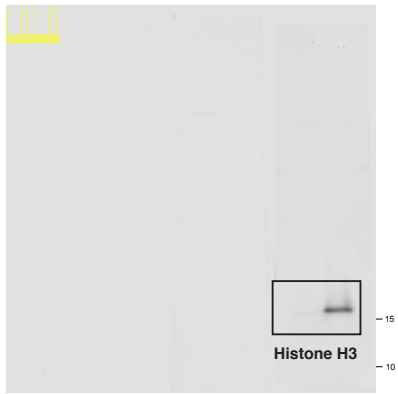

Extended Data Figure 1F

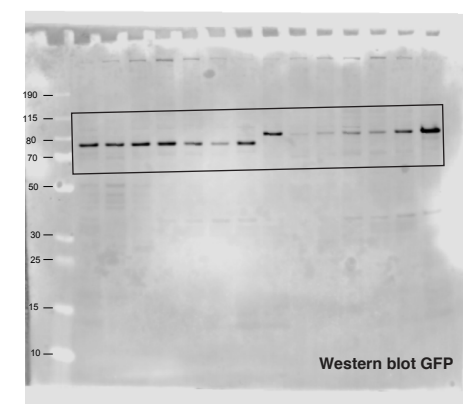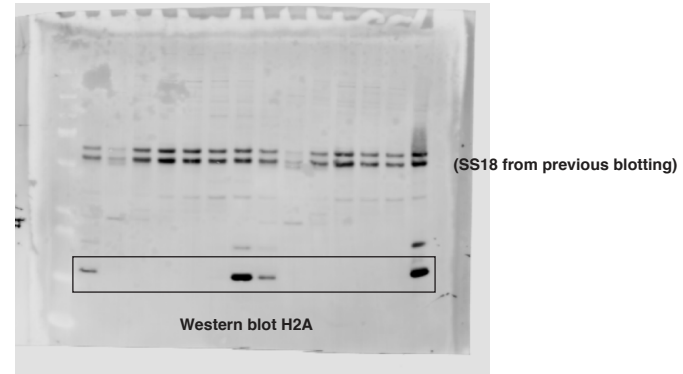

Extended Data Figure 1G

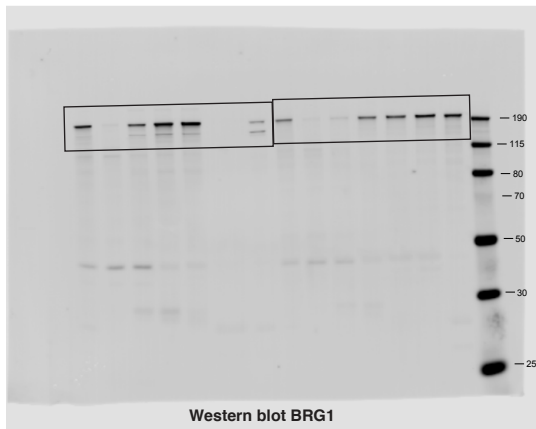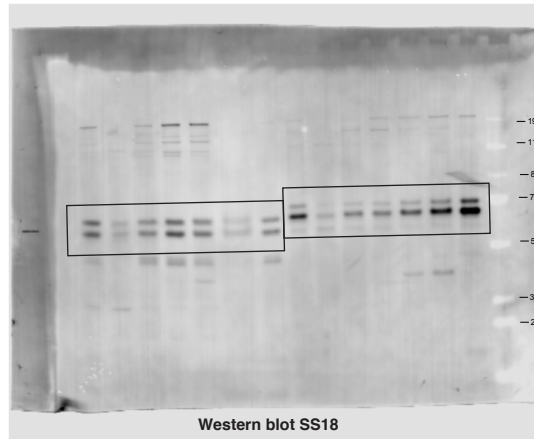

Figure 2A

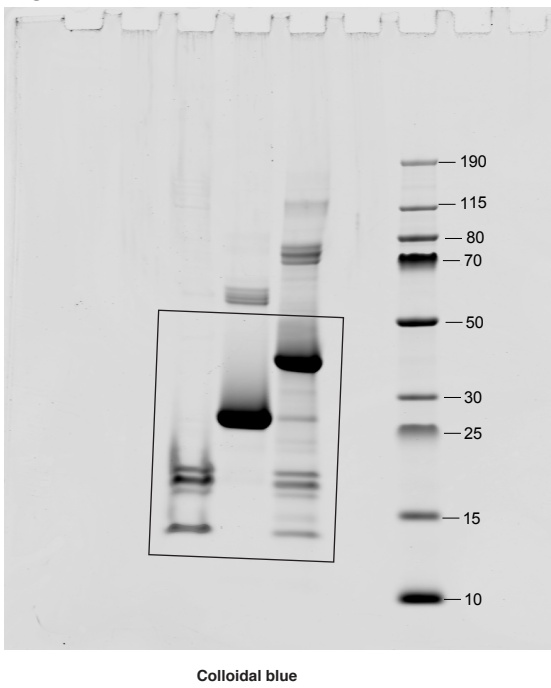

Figure 2E

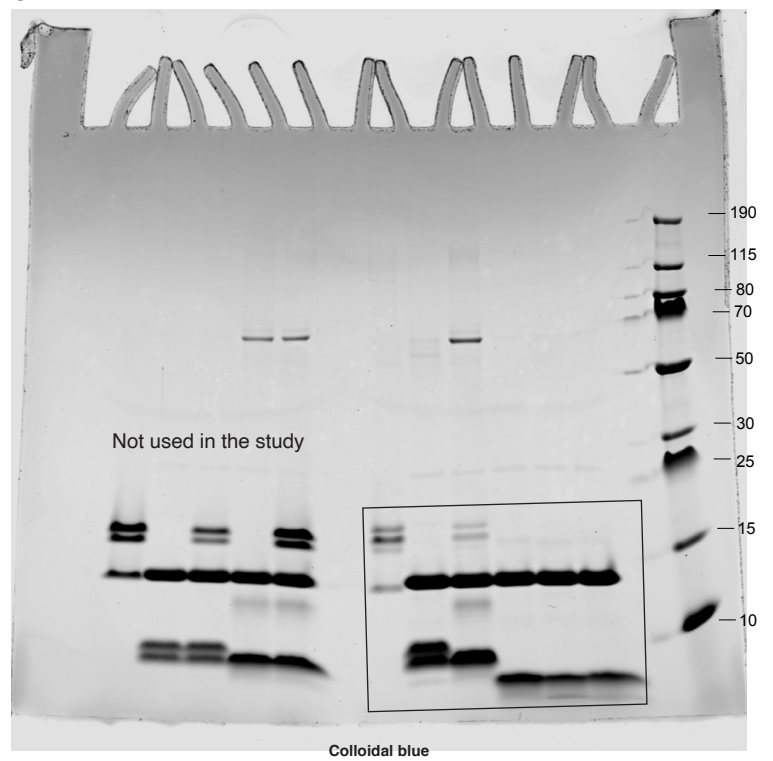

Figure 2F

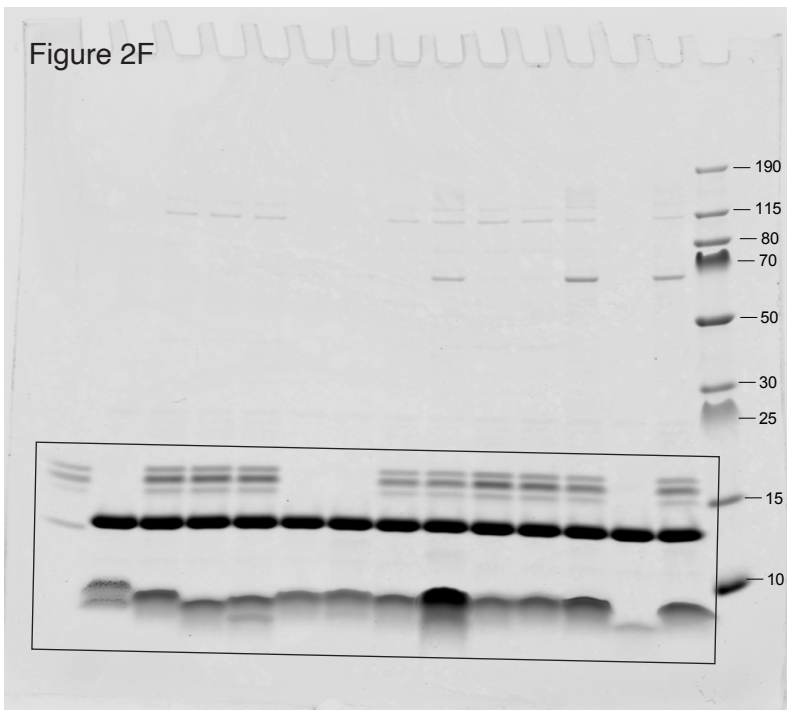

Colloidal blue

Extended Data Figure 2A

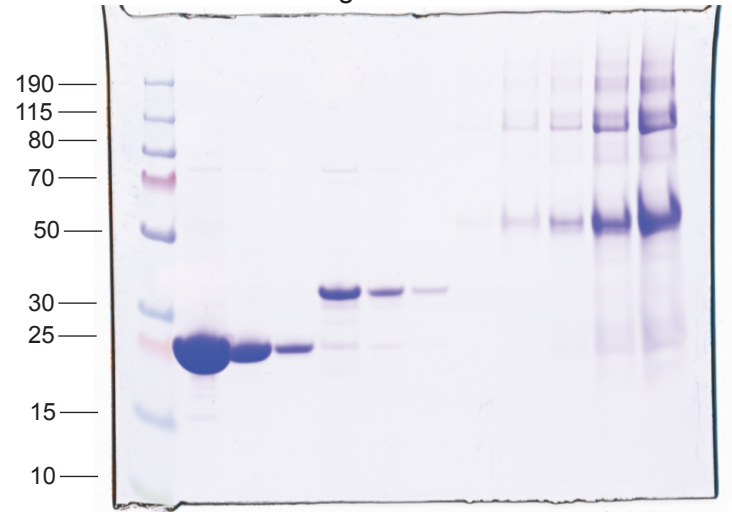

Extended Data Figure 2B

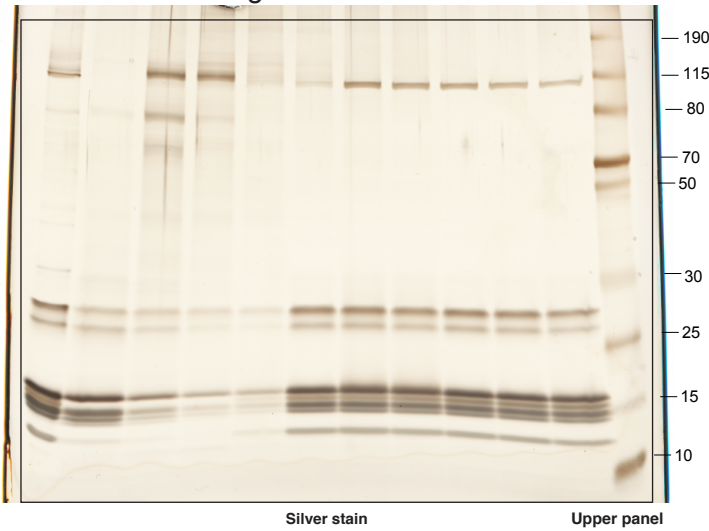

Silver stain

Upper panel

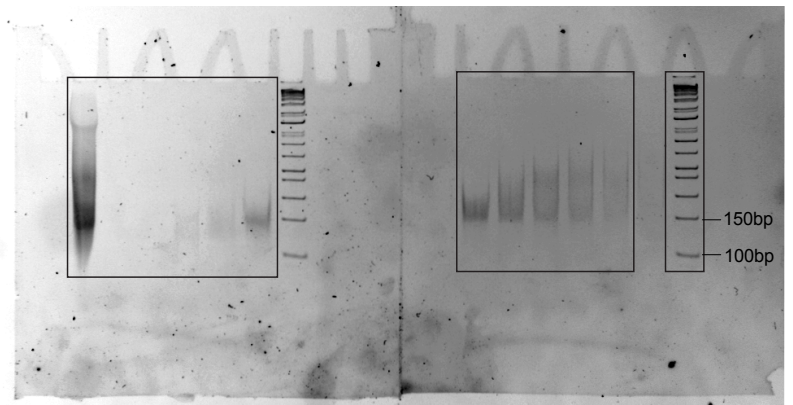

Sybr Gold

Lower panel

Extended Data 2C, top panel

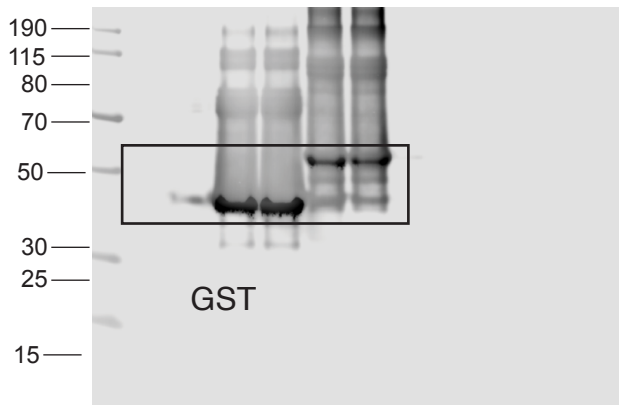

GST

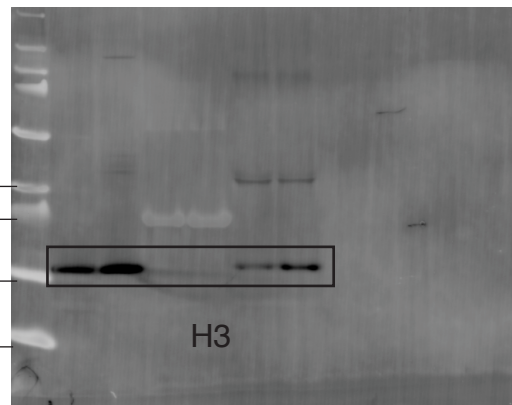

H3

Extended Data 2C, bottom panel

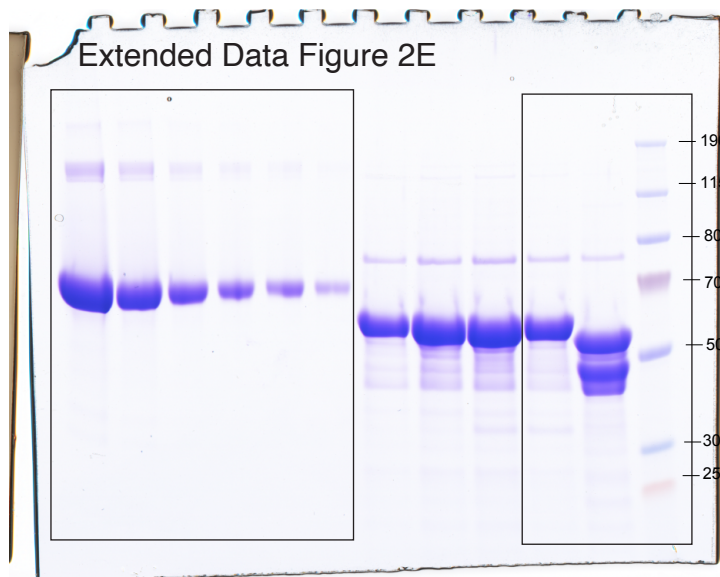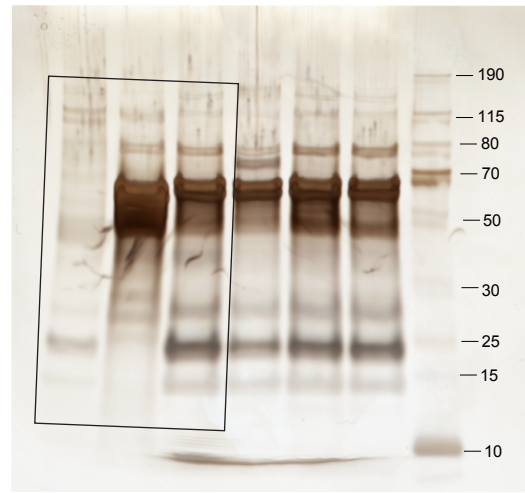

Coomassie

Figure 3A

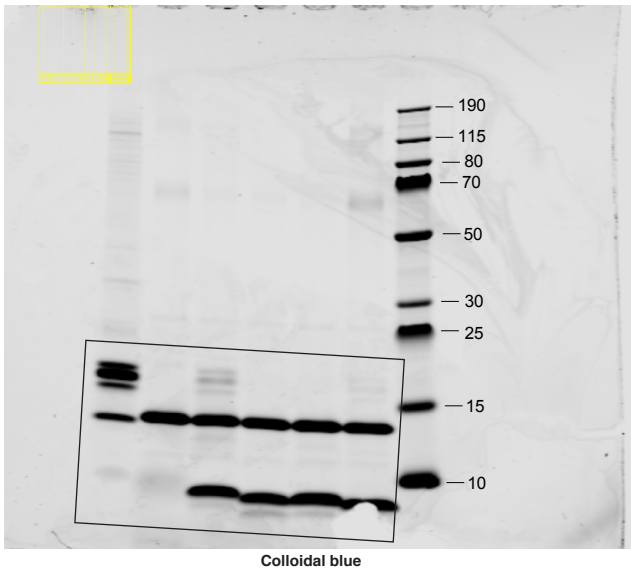

Figure 3B

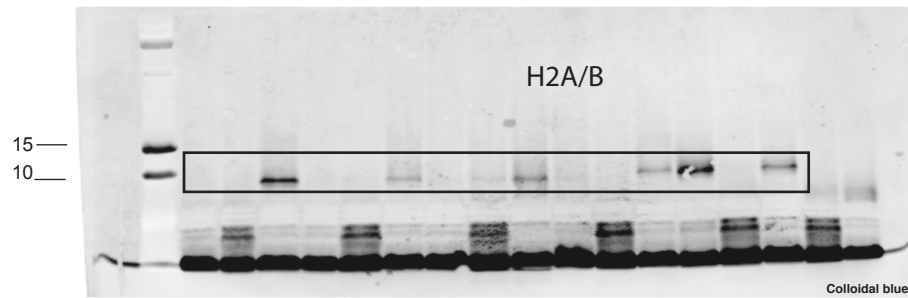

Figure 3D

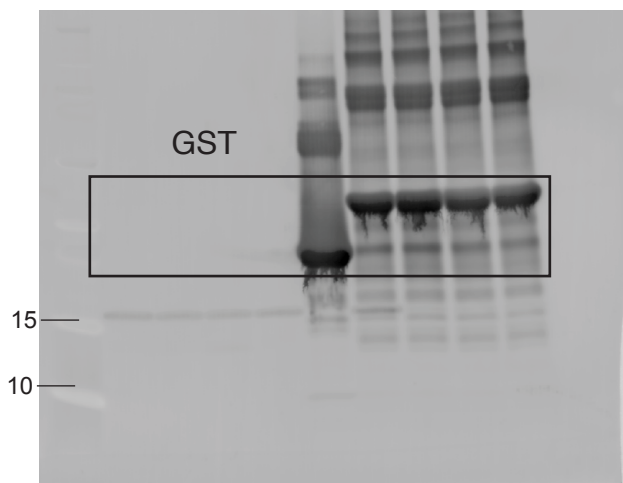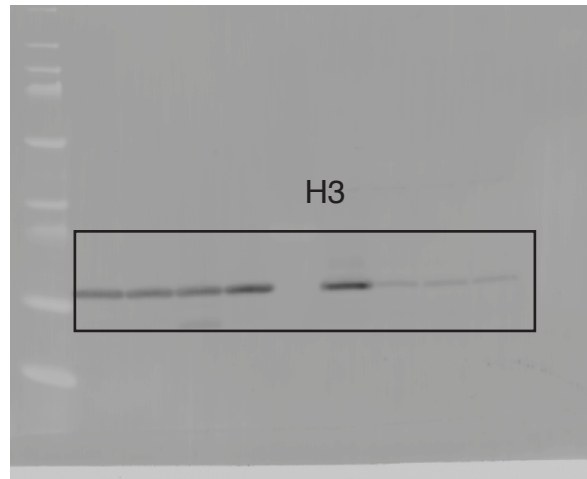

Figure 3E

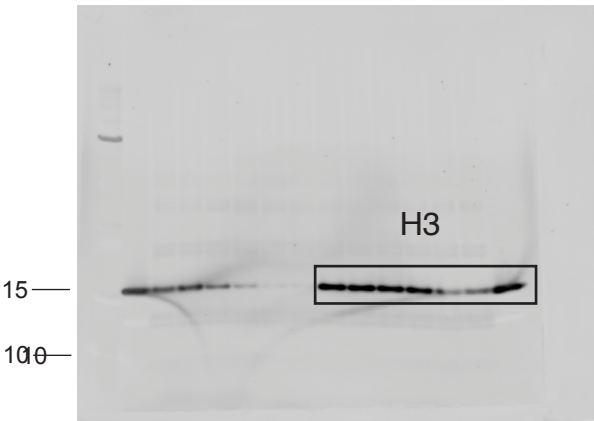

Figure 3H

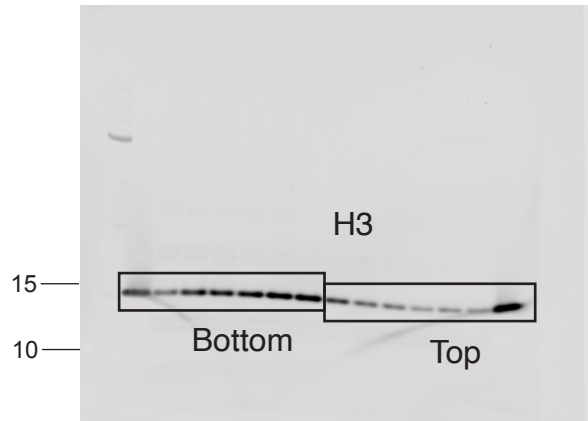

Extended Data Figure 3C

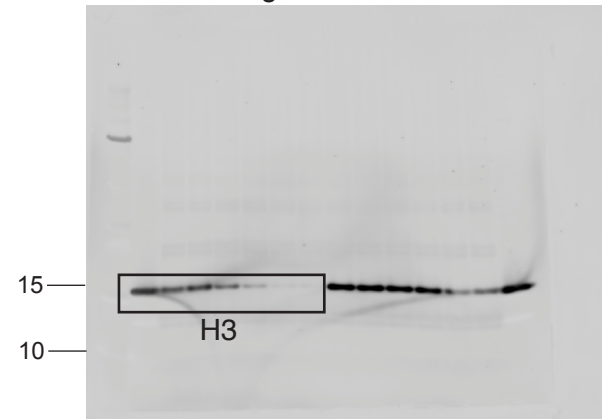

Extended Data Figure 3D

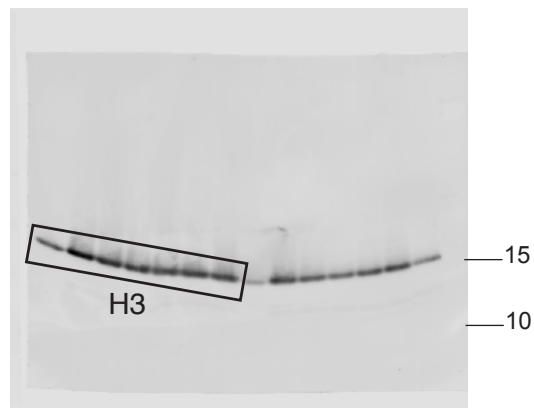

Extended Data Figure 3F

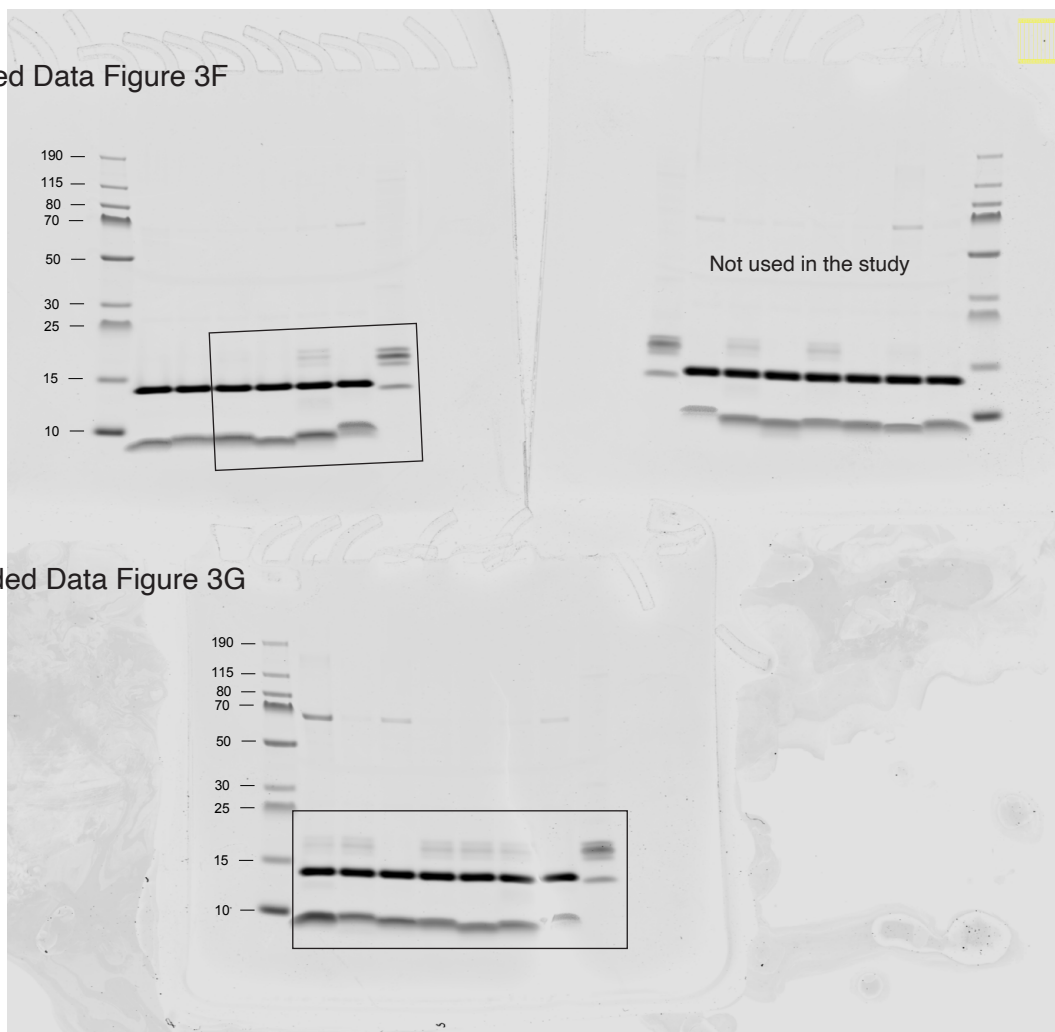

Extended Data Figure 3G

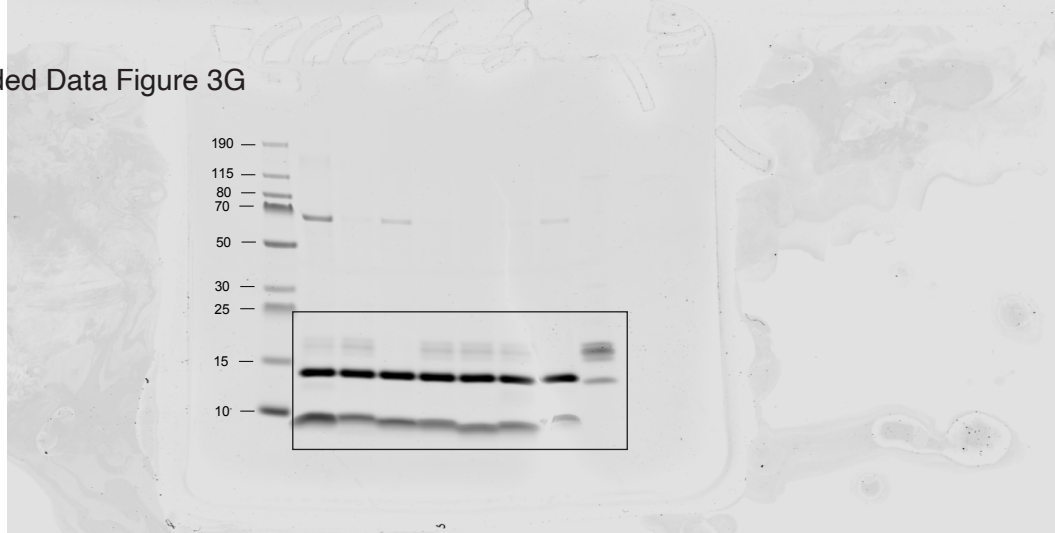

Extended Data Figure 4B (left)

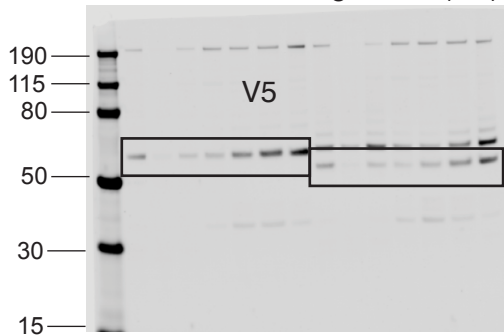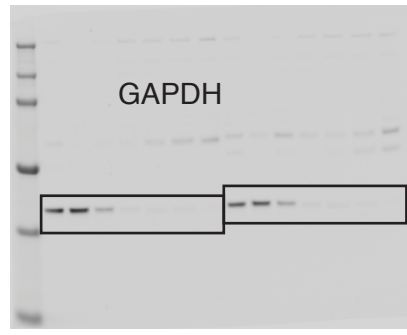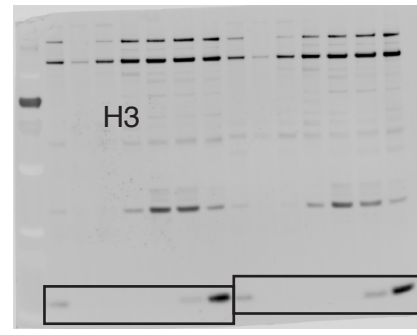

Extended Data Figure 4B (right)

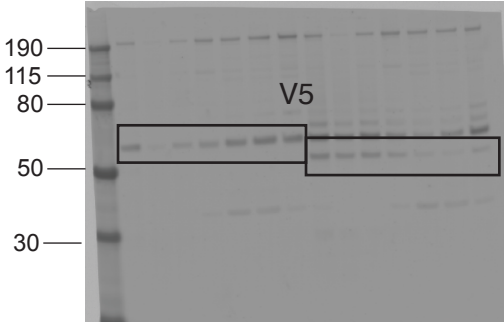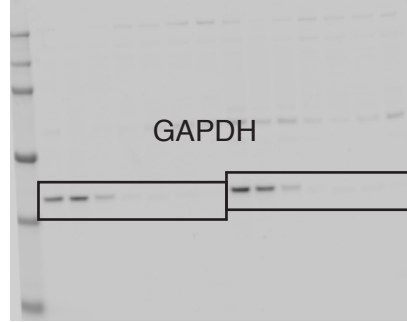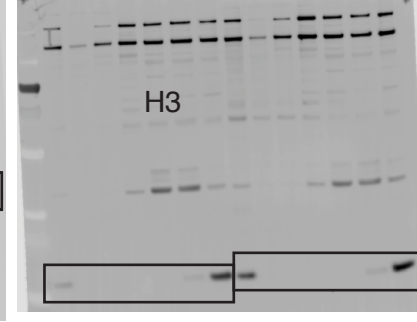

Extended Data Figure 4E [shSSX proliferation rescue blot]

Extended Data Figure 4E [shSSX proliferation rescue blots]

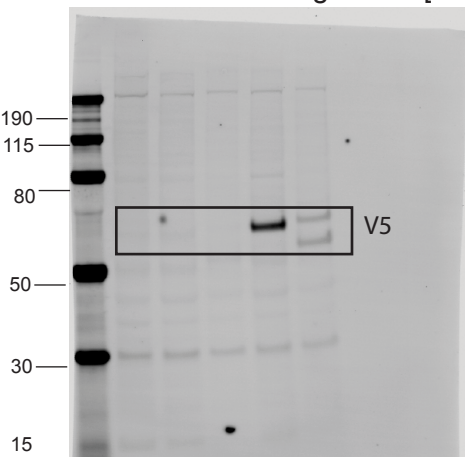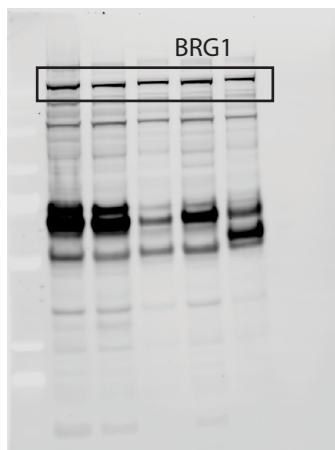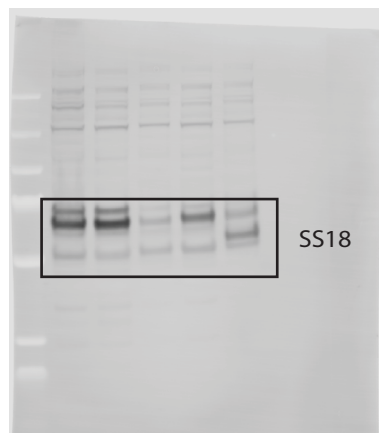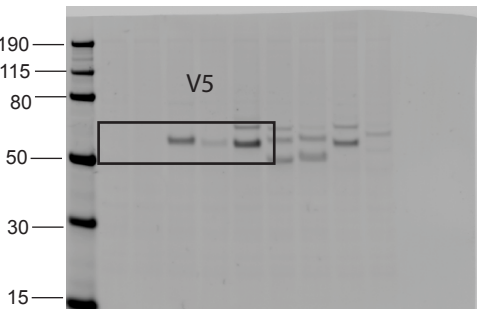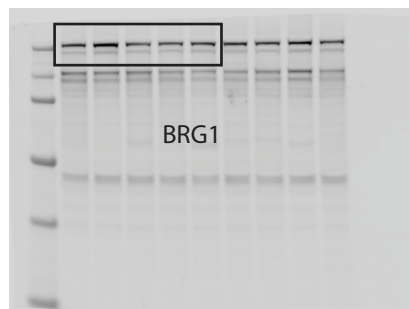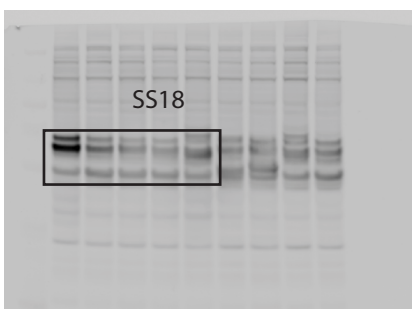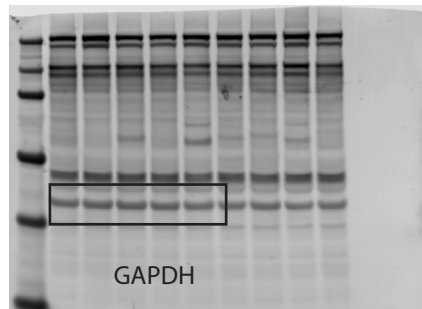

Extended Data Figure 4E [shSSX proliferation rescue blot, continued]

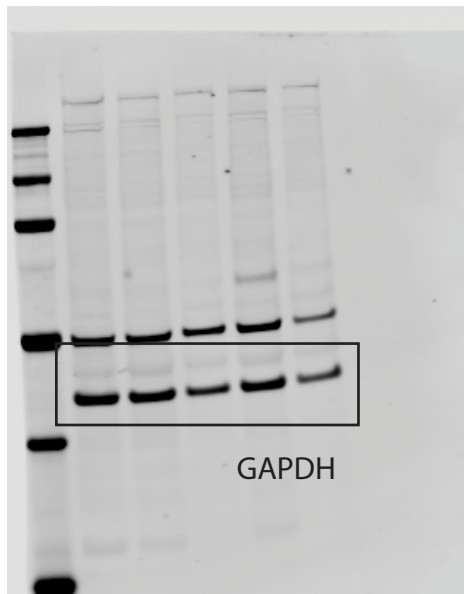

Figure 4D

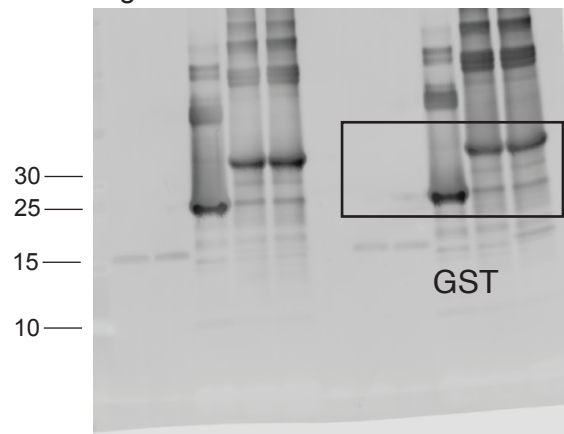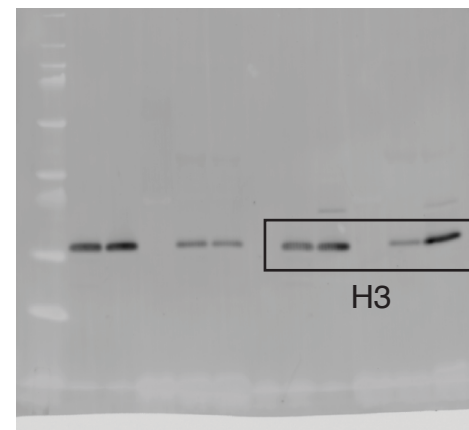

Figure 4F and Ext. Data Fig. 8G

Figure 4F (rep 1)

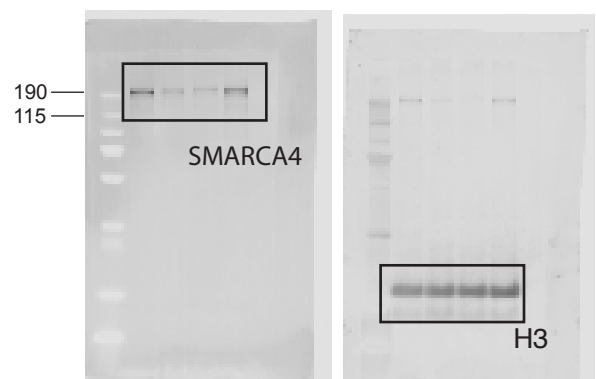

Blot 2 (rep 2) Ext. Data Fig. 8G

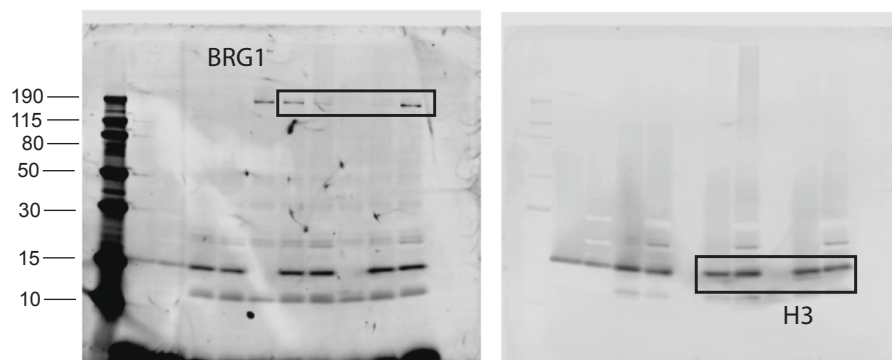

Blot 3 (rep 3) Ext. Data Fig. 8G

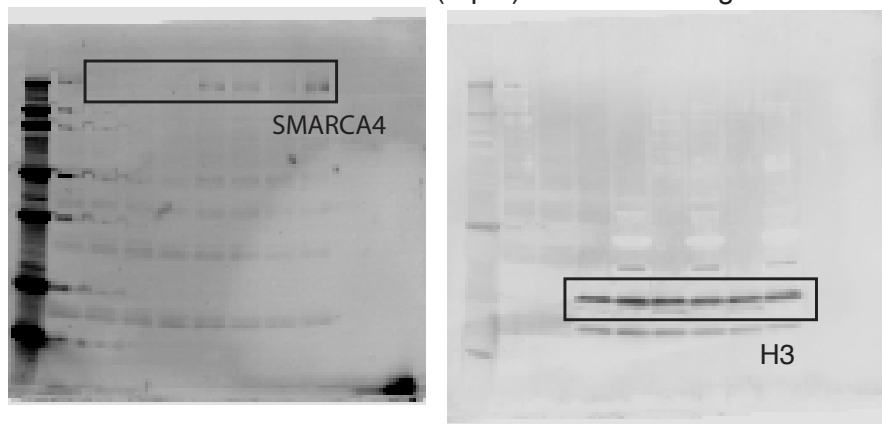

Blot 4 (rep 4) Ext. Data Fig. 8G

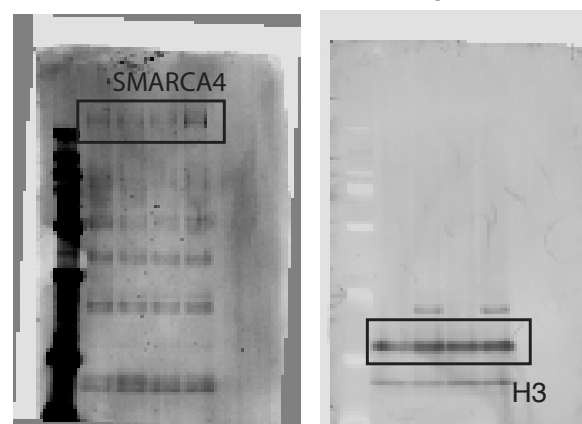

Blot 1 (rep 5) Ext. Data Fig. 8G

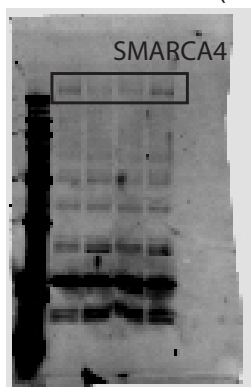

Figure 4G

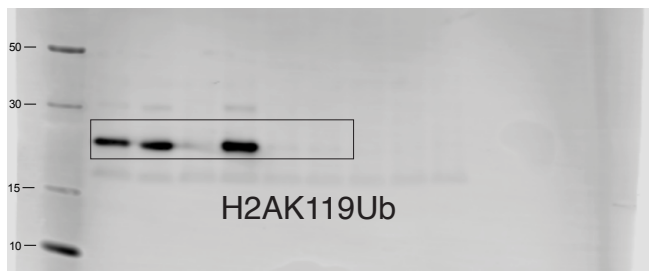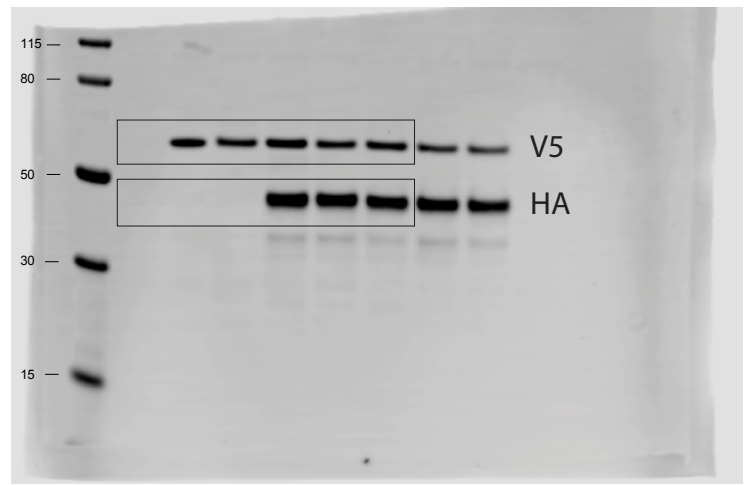

Figure 4J

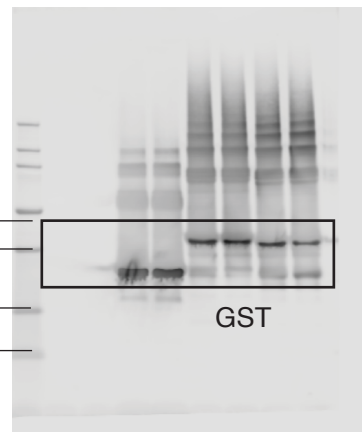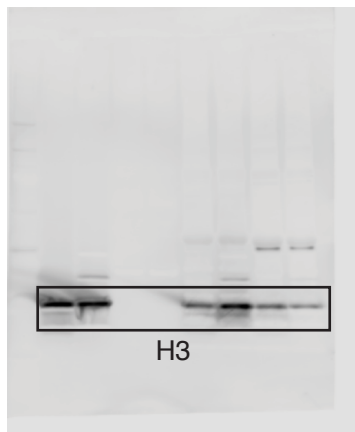

Extended Data Figure 5B

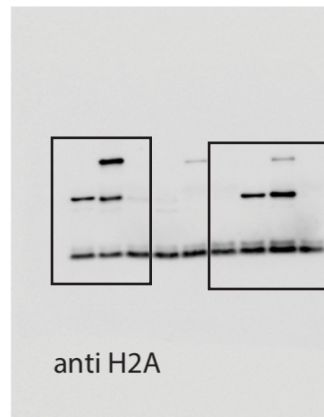

Extended Data Figure 5C

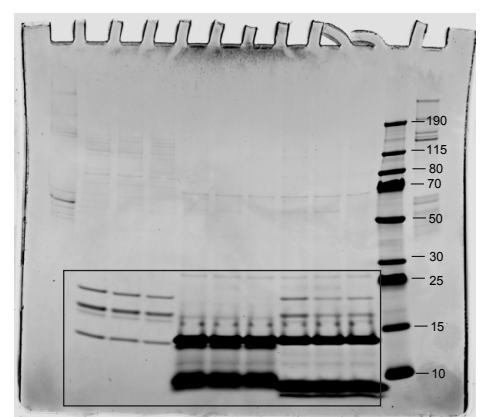

Extended Data Figure 6C

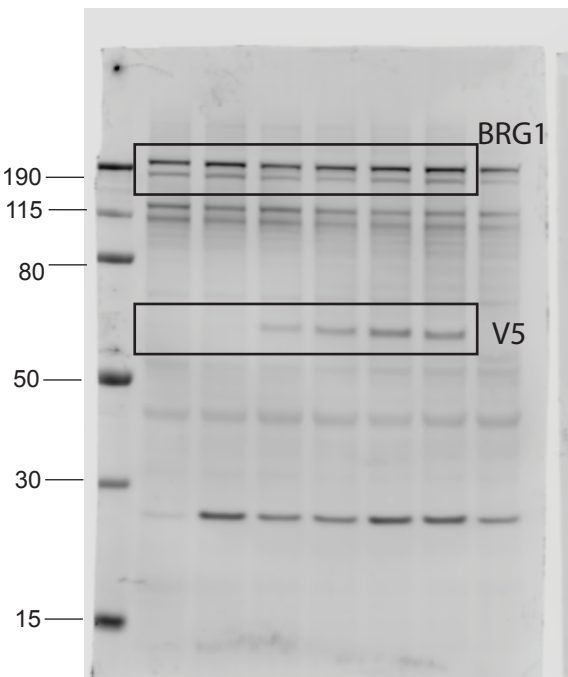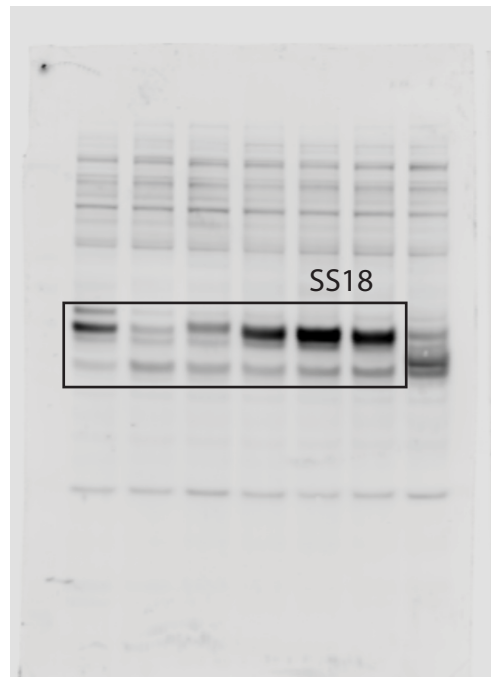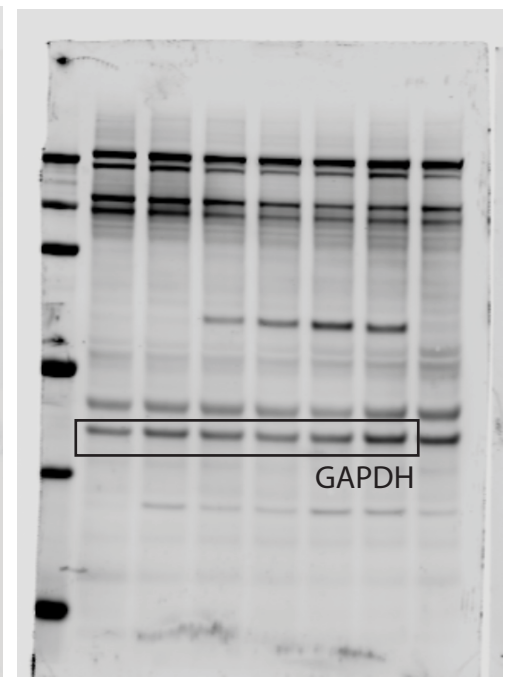



Extended Data Figure 7D [Left, V5-SS18-SSX mutant V5-IPs]

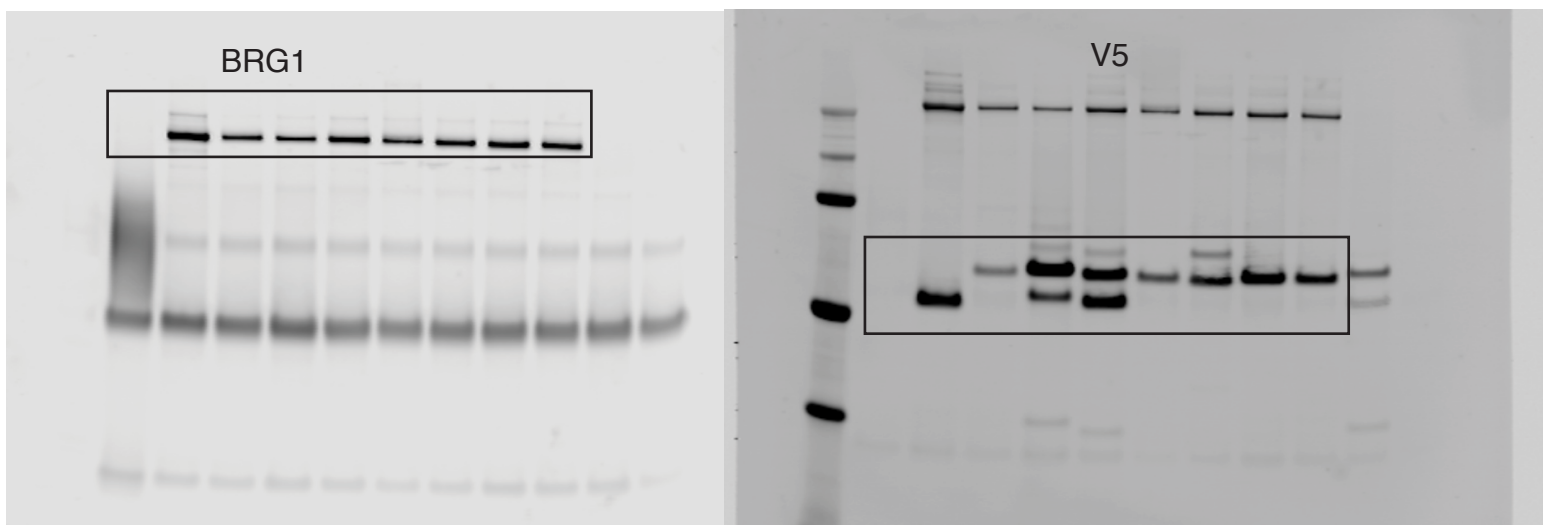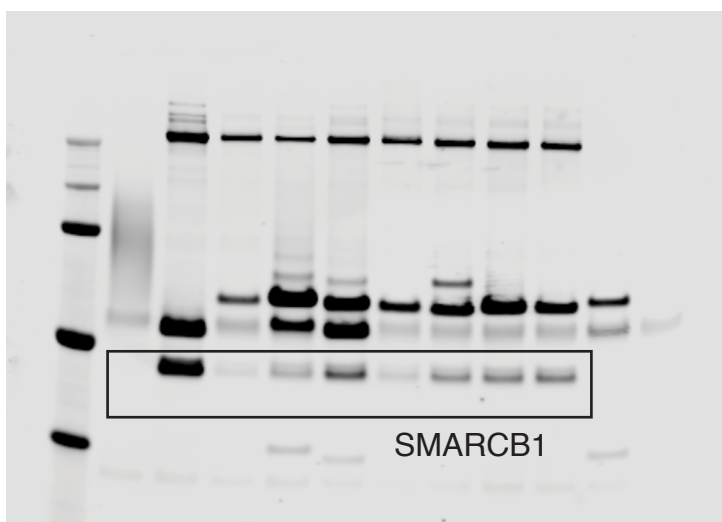

Extended Data Figure 7E

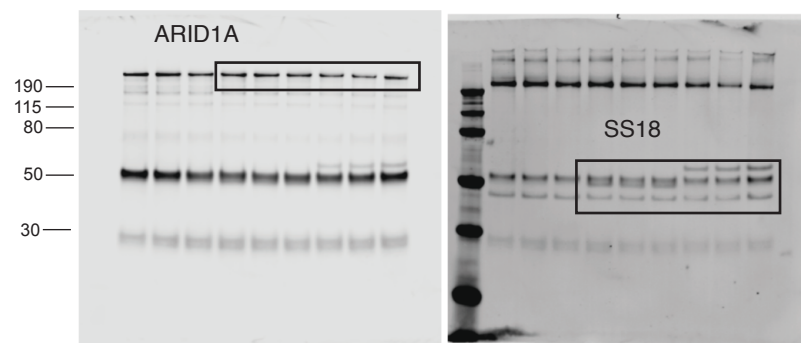

Extended Data Figure 7D [Right, V5-SS18-SSX mutant inputs]

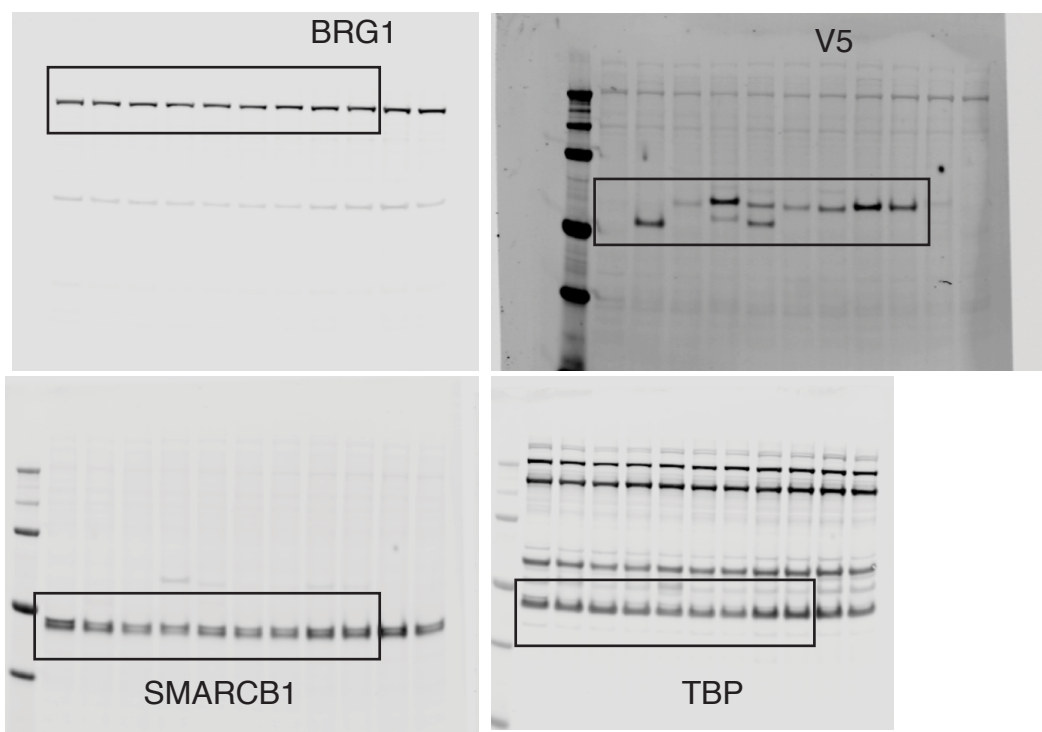

Extended Data Figure 8F

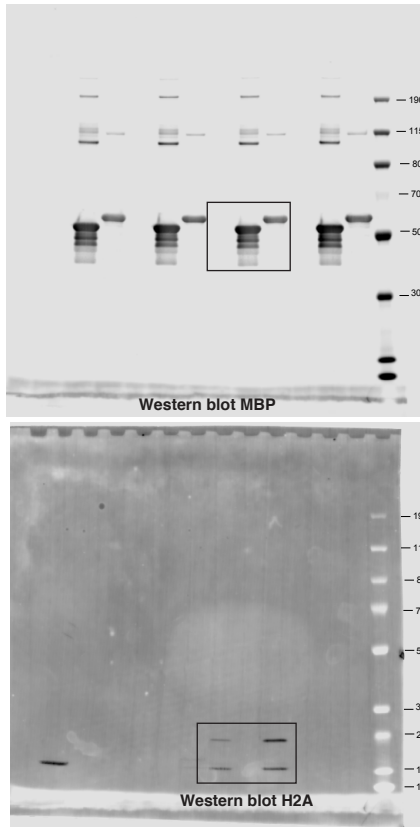

Extended Data Figure 8H

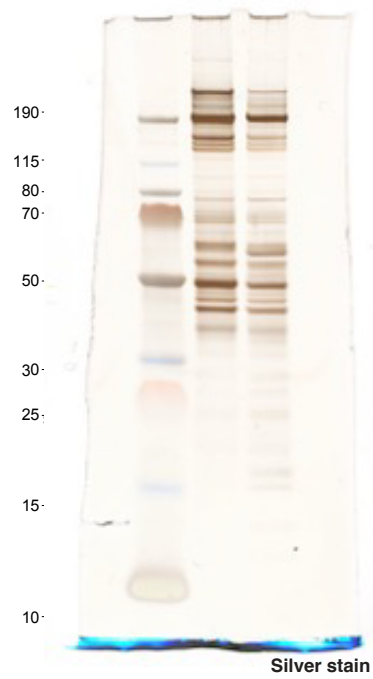

Extended Data Figure 9B

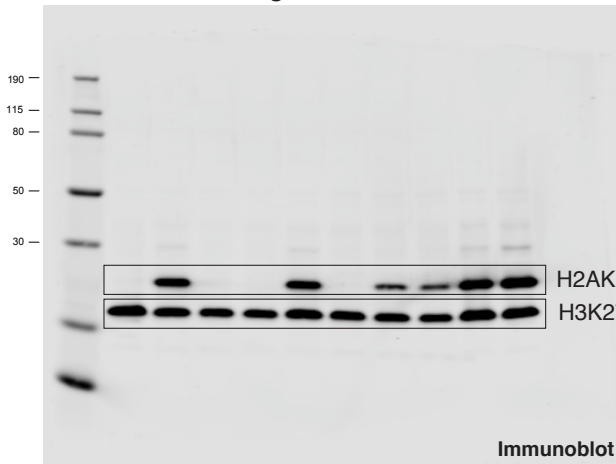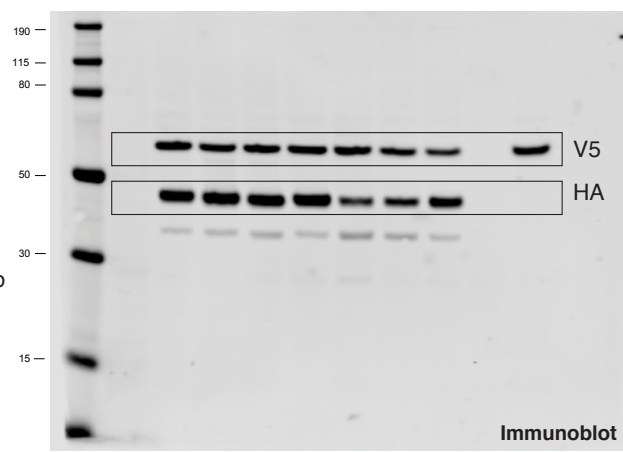

Extended Data Figure 9G

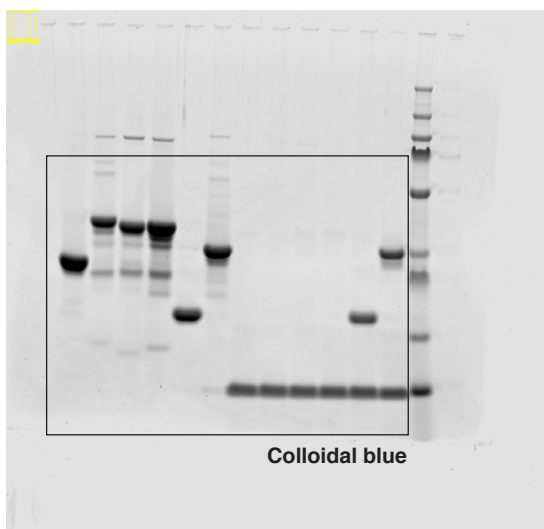

Supplement: NIHMS1641564-supplement-Supplementary_Figure_1_ALL_RAW_GELS_and_BLOTS.pdf [file NIHMS1641564-supplement-Supplementary_Figure_1_ALL_RAW_GELS_and_BLOTS.pdf]
